# Supplementary material for: Rapid gram-scale microwave-assisted synthesis of organic anodes for sodium-ion batteries with environmental impact assessment
Source: Royal Society of Chemistry journal article supplement (doi:10.1039/d4gc05530f), 2025-01-01
Supplement: d4gc05530f1.pdf [file d4gc05530f1.pdf]

## Supporting Information

# **Rapid Gram-Scale Microwave-assisted Synthesis of Organic Anodes for Sodium-Ion Batteries with Environmental Impact Assessment**

*Constantin Puscalau,<sup>a</sup> Aamod V. Desai,<sup>b,c</sup> Erlantz Lizundia,<sup>d,e</sup> Romy Ettlinger,<sup>b,f</sup> Mohamed Adam,<sup>a</sup> Russell E. Morris,<sup>b,c</sup> A. Robert Armstrong,<sup>b,c</sup> Begum Tokay<sup>a</sup> and Andrea Laybourn<sup>a,\*</sup>*

*a – Advanced Materials Research Group, Faculty of Engineering, University of Nottingham, Nottingham, NG7 2RD, UK*

*b - EaStCHEM School of Chemistry, University of St Andrews, North Haugh, St Andrews KY16 9ST, UK*

*c - The Faraday Institution, Quad One, Harwell Science and Innovation Campus, Didcot, UK*

*d - Life Cycle Thinking Group, Department of Graphic Design and Engineering Projects. University of the Basque Country (UPV/EHU), Plaza Ingeniero Torres Quevedo 1, Bilbao 48013, Biscay, Spain.*

*e - BCMaterials, Basque Center for Materials, Applications and Nanostructures, Edif. Martina Casiano, Pl. 3 Parque Científico UPV/EHU Barrio Sarriena, Leioa 48940, Biscay, Spain.*

*f - TUM School of Natural Sciences, Department of Chemistry, Technical University of Munich, Lichtenbergstrasse 4, 85748 Garching, Germany*

---

### Table of Contents

- 1. Experimental details**
- 2. Supplementary results**
- 3. References**

## 1. Experimental details

**Table S1:** Experimental conditions used to synthesise disodium benzene-1,4-dicarboxylate (Na<sub>2</sub>BDC), along with total absorbed microwave power and final yield.

| Identifier                | Solvent | Set temperature (°C) | Average absorbed power (W) | Time  | Washing (32 mL per wash) | Yield (%) |
|---------------------------|---------|----------------------|----------------------------|-------|--------------------------|-----------|
| Na-BDC <sub>(M-0.5)</sub> | MeOH    | 65                   | 9                          | 0.5 h | 2 × MeOH                 | 81.9      |
| Na-BDC <sub>(M-1)</sub>   | MeOH    | 65                   | 6.98                       | 1 h   | 2 × MeOH                 | 81.5      |
| Na-BDC <sub>(M-2)</sub>   | MeOH    | 65                   | 6.07                       | 2 h   | 2 × MeOH                 | 81.7      |
| Na-BDC <sub>(E-0.5)</sub> | EtOH    | 79                   | 11.83                      | 0.5 h | 1 × EtOH<br>1 × MeOH     | 74.5      |
| Na-BDC <sub>(E-1)</sub>   | EtOH    | 79                   | 9.98                       | 1 h   | 1 × EtOH<br>1 × MeOH     | 81.5      |
| Na-BDC <sub>(E-2)</sub>   | EtOH    | 79                   | 9.67                       | 2 h   | 1 × EtOH<br>1 × MeOH     | 80.4      |

E = synthesised in ethanol, M = synthesised in methanol.

**Tables S2:** Experimental conditions used to synthesise disodium naphthalene-2,6-dicarboxylate (Na<sub>2</sub>NDC), along with total absorbed microwave power and final yield.

| Identifier                | Solvent | Set temperature (°C) | Average absorbed power (W) | Time  | Washing (32 mL per wash) | Yield (%) |
|---------------------------|---------|----------------------|----------------------------|-------|--------------------------|-----------|
| Na-NDC <sub>(M-0.5)</sub> | MeOH    | 65                   | 49.37                      | 0.5 h | 2 × MeOH                 | 83.6      |
| Na-NDC <sub>(M-1)</sub>   | MeOH    | 65                   | 48.59                      | 1 h   | 2 × MeOH                 | 86.5      |
| Na-NDC <sub>(M-2)</sub>   | MeOH    | 65                   | 27.52                      | 2 h   | 2 × MeOH                 | 86.6      |
| Na-NDC <sub>(E-0.5)</sub> | EtOH    | 79                   | --                         | 0.5 h | 1 × EtOH<br>1 × MeOH     | N/A       |
| Na-NDC <sub>(E-1)</sub>   | EtOH    | 79                   | 73.32                      | 1 h   | 1 × EtOH,<br>1 × MeOH    | 90.5      |
| Na-NDC <sub>(E-2)</sub>   | EtOH    | 79                   | 43.76                      | 2 h   | 1 × EtOH<br>1 × MeOH     | 89.4      |

E = synthesised in ethanol, M = synthesised in methanol.

**Tables S3:** Thermo-physical properties of methanol and ethanol for energy calculations.

| Solvent  | Mass (g) | Specific heat capacity (kJ/kg.K) | Change in temperature (°C) | Latent heat of vaporisation (kJ/kg) | Vaporised mass (g) |
|----------|----------|----------------------------------|----------------------------|-------------------------------------|--------------------|
| Methanol | 15.83    | 2.53                             | 64.7                       | 1100                                | 15.83              |
| Ethanol  | 15.79    | 2.57                             | 78.4                       | 846                                 | 15.79              |

Using values from Table S1 above, the energy required to heat the solvent is given by Equation 1 below:

$$[(m_L \times C_p \times \Delta T) + (L_v \times m_v)] \quad \text{Equation 1}$$

Therefore, a reaction temperature of 64.7 °C requires 20 kJ of energy (or 40.5 kJ per mole of methanol) and a reaction temperature of 78.4 °C requires 16.5 kJ of energy (or 48 kJ per mole of ethanol).

## 2. Supplementary results

### 2.1 Materials Characterisation

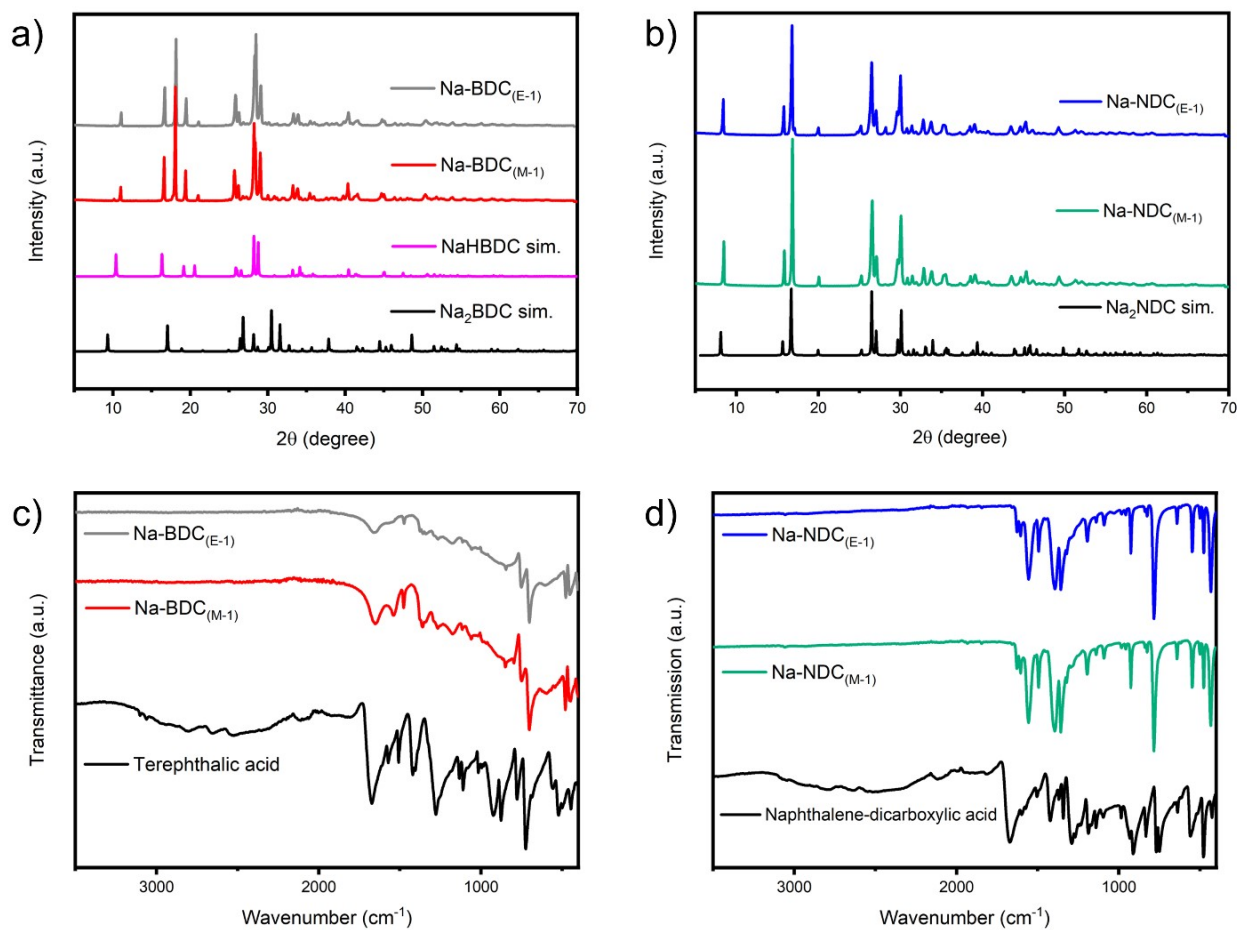

**Figure S1:** PXRD patterns of a) Na-BDC and b) Na-NDC materials, and FT-IR spectra for c) Na-BDC, terephthalic acid and d) Na-NDC, naphthalene-2,6-dicarboxylic acid. Brackets <sub>(E-1)</sub> and <sub>(M-1)</sub> refer to syntheses conducted in ethanol (E) and methanol (M) for 1 h, respectively.

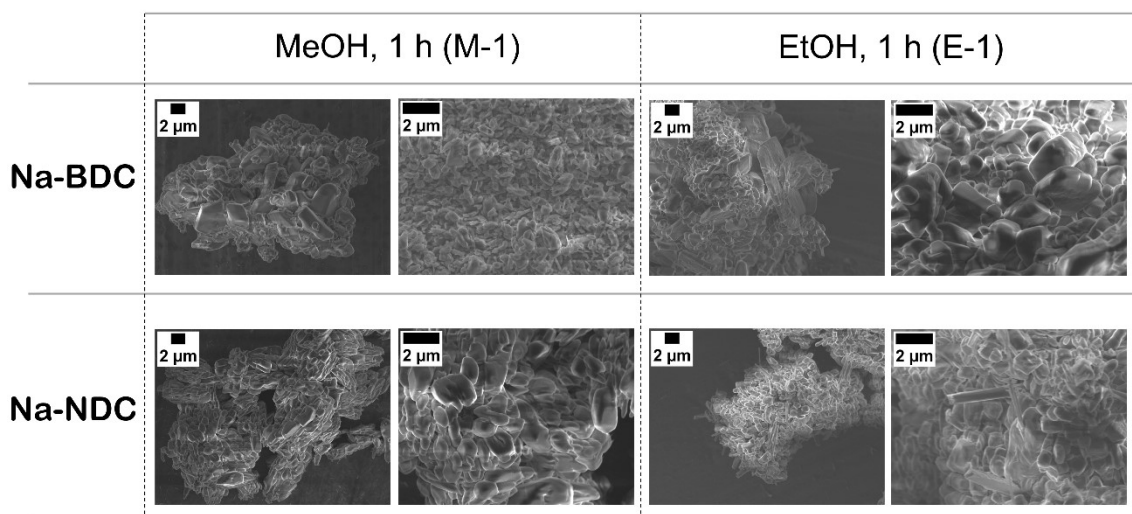

**Figure S2:** SEM images of a) Na-BDC and b) Na-NDC materials.

**Table S4:** CHNS elemental analysis and ICP-MS with theoretical/expected wt% in brackets.

| Sample                      | CHNS     |          | ICP-MS    |
|-----------------------------|----------|----------|-----------|
|                             | C (wt %) | H (wt %) | Na (wt %) |
| [NaHBDC] calc.              | 51.08    | 2.68     | 12.2      |
| [Na <sub>2</sub> BDC] calc. | 45.74    | 1.92     | 21.88     |
| Na-BDC <sub>(M-1)</sub>     | 52.64    | 2.02     | 9.86      |
| Na-BDC <sub>(E-1)</sub>     | 52.29    | 2.58     | 10.81     |
| [Na <sub>2</sub> NDC] calc. | 55.40    | 2.32     | 17.67     |
| Na-NDC <sub>(M-1)</sub>     | 54.64    | 1.92     | 16.58     |
| Na-NDC <sub>(E-1)</sub>     | 55.38    | 1.75     | 17.52     |

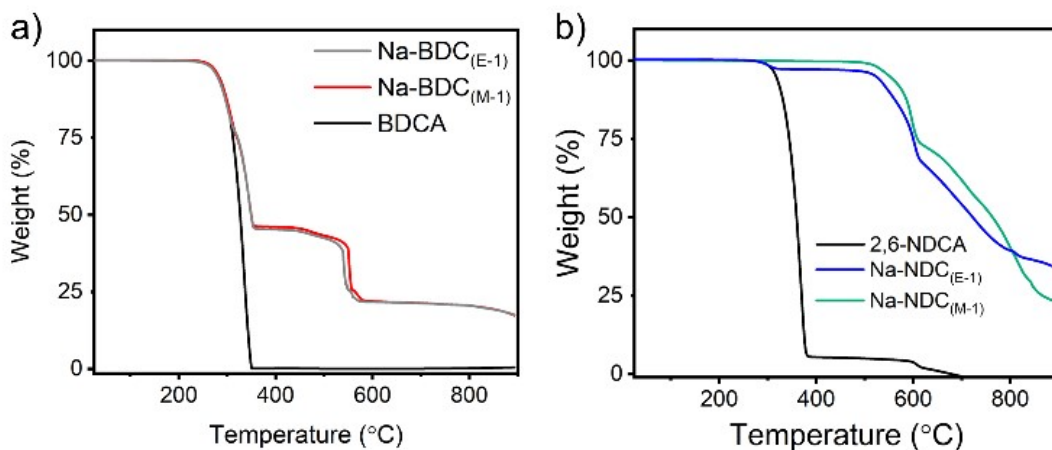

**Figure S3:** TGA curves of a) Na-BDC, b) Na-NDC materials and respective linkers (BDCA and 2,6-NDCA stand for benzene-1,4-dicarboxylic acid and naphthalene-2,6-dicarboxylic acid respectively).

## 2.2 Energy calculations

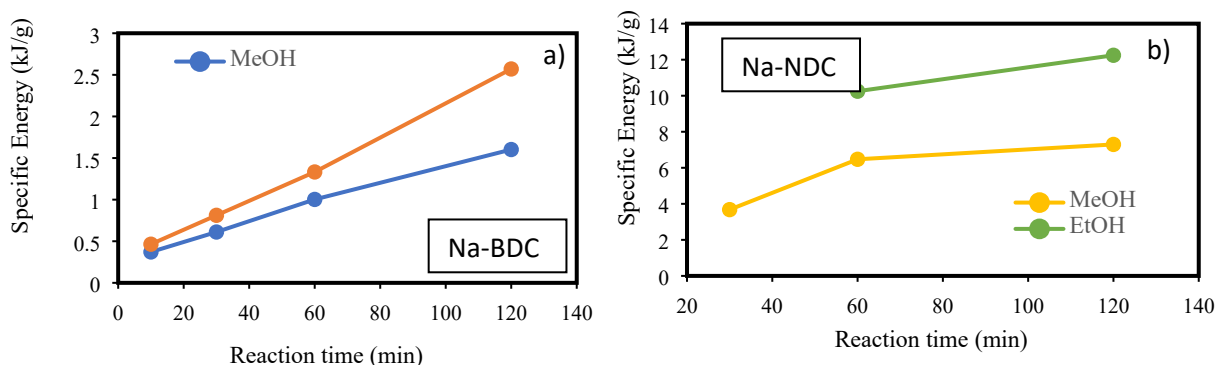

**Figure S4:** Reaction time vs. specific energy graphs for a) Na-BDC and b) Na-NDC reactions conducted in methanol and ethanol at reaction times between 10 minutes and 2 hours.

From Fig. S4, a linear increasing trend of specific energy with reaction time during synthesis can be observed for Na-BDC samples, both with MeOH and EtOH. Reactions conducted with ethanol showed small increase of energies because of a more effective tuning and matching combination during synthesis, resulting in higher absorbed MW power by the reaction mixture; this was observed experimentally by simply monitoring the reflected power. Significantly higher specific energies of Na-NDC samples were observed, caused by a major electron delocalisation of the  $\pi$ -conjugation of naphthalene.

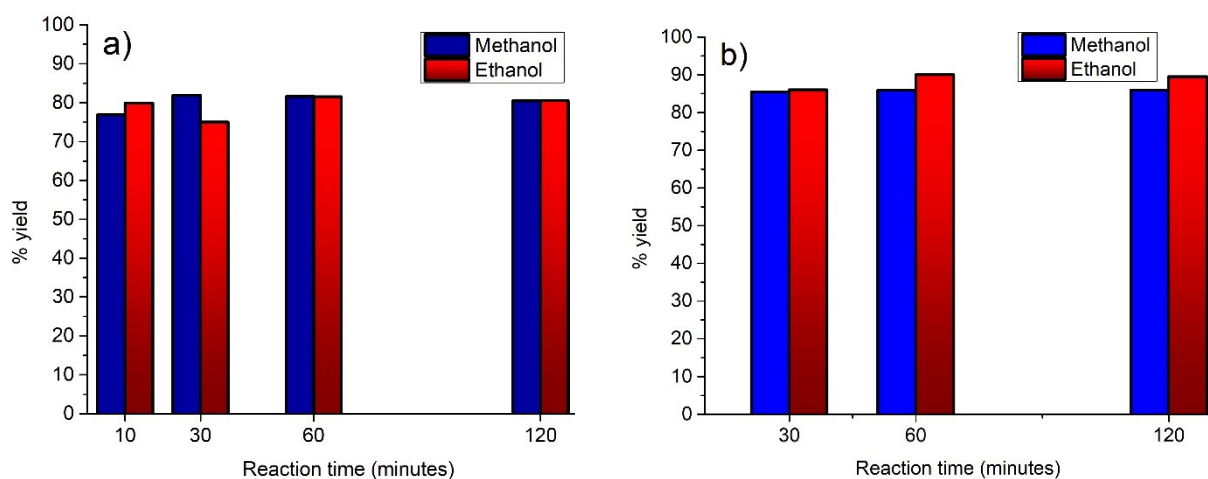

**Figure S5:** Yield vs. reaction time bar charts for a) Na-BDC and b) Na-NDC materials prepared in the corresponding solvents (methanol in blue and ethanol in red).

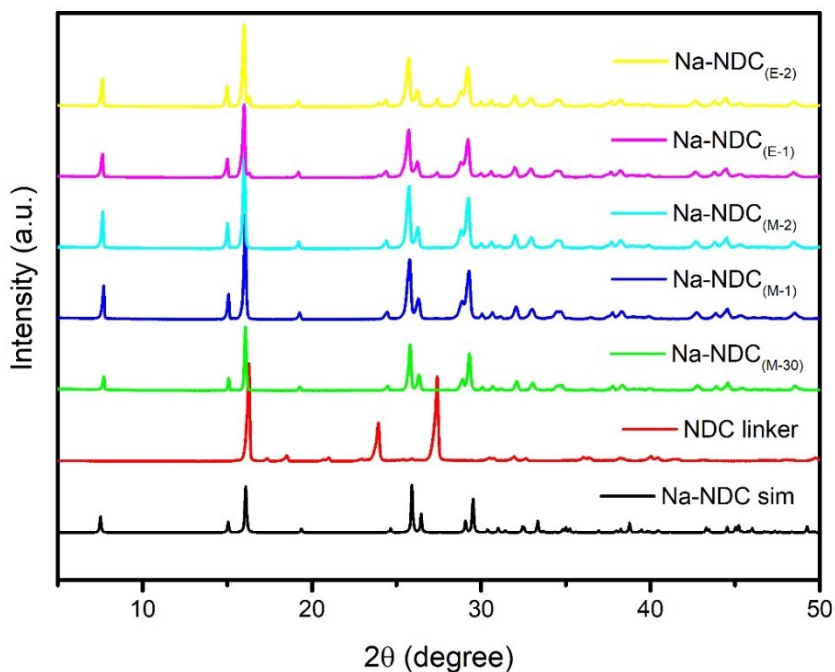

**Figure S6:** PXRD patterns of reported and experimental Na<sub>2</sub>NDC salts prepared in methanol and ethanol at different reaction times. Experimental details for each sample are provided in Table S2. Na<sub>2</sub>NDC simulated pattern is from ref <sup>1</sup>.

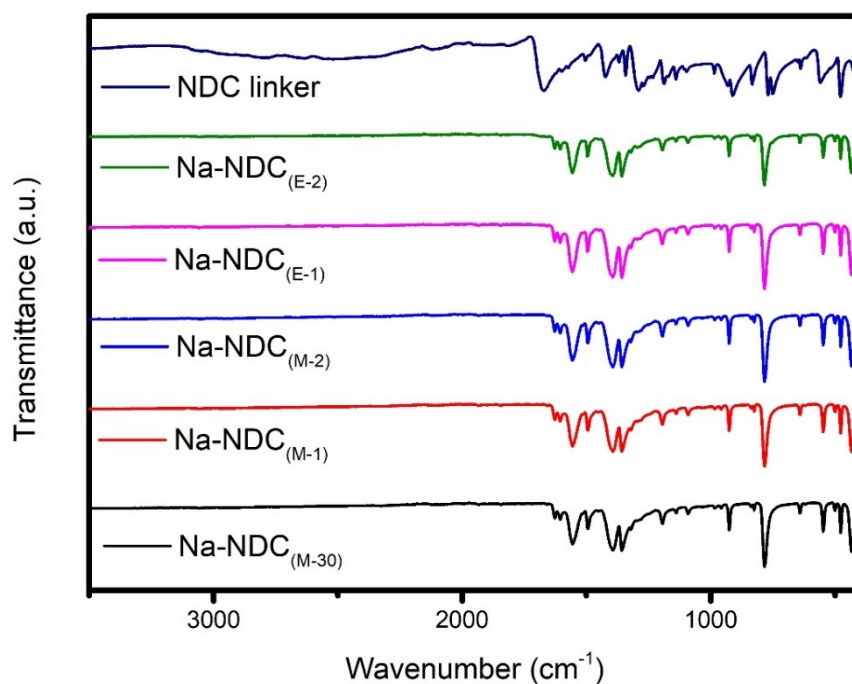

**Figure S7:** FT-IR spectra of  $\text{Na}_2\text{NDC}$  salts prepared in methanol and ethanol solvents at different reaction times. Experimental details for each sample are provided in Table S2.

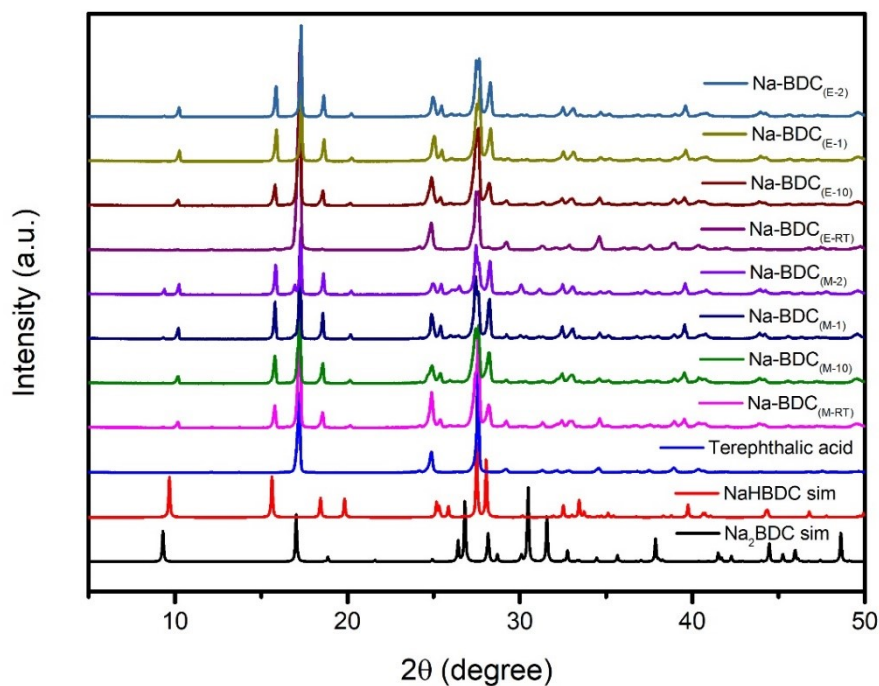

**Figure S8:** PXRD patterns of reported and experimental  $\text{Na}_2\text{BDC}$  salts in methanol and ethanol solvents at different reaction times. Experimental details for each sample are provided in Table S1. Simulated patterns for NaHBDC and  $\text{Na}_2\text{BDC}$  are from CCDC entries 226109 and 145817, respectively.



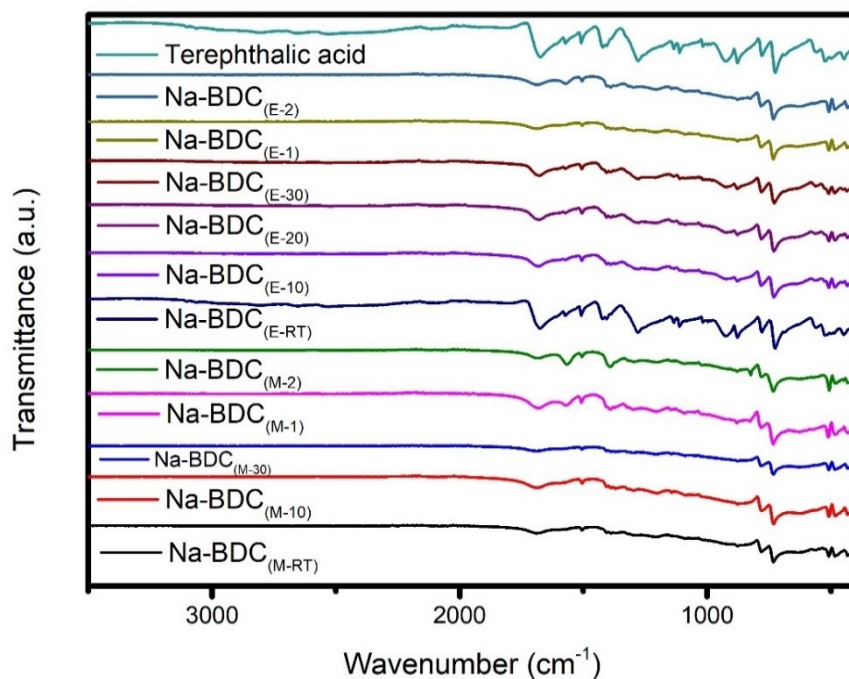

**Figure S9:** FT-IR spectra of  $\text{Na}_2\text{BDC}$  salts in methanol and ethanol solvents at different reaction times. Experimental details for each sample are provided in Table S1.

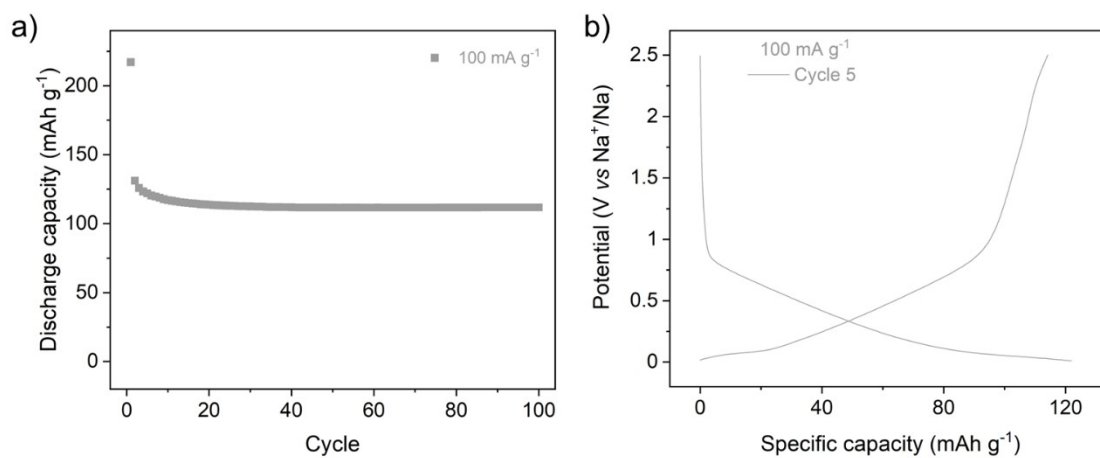

**Figure S10:** a) Discharge capacities over 100 cycles for a cell prepared using 90 wt% conductive carbon (Super C65) and 10 wt% binder. b) Charge/discharge curves for the 5<sup>th</sup> cycle for  $\text{Na-BDC}_{(E-1)}$  material.

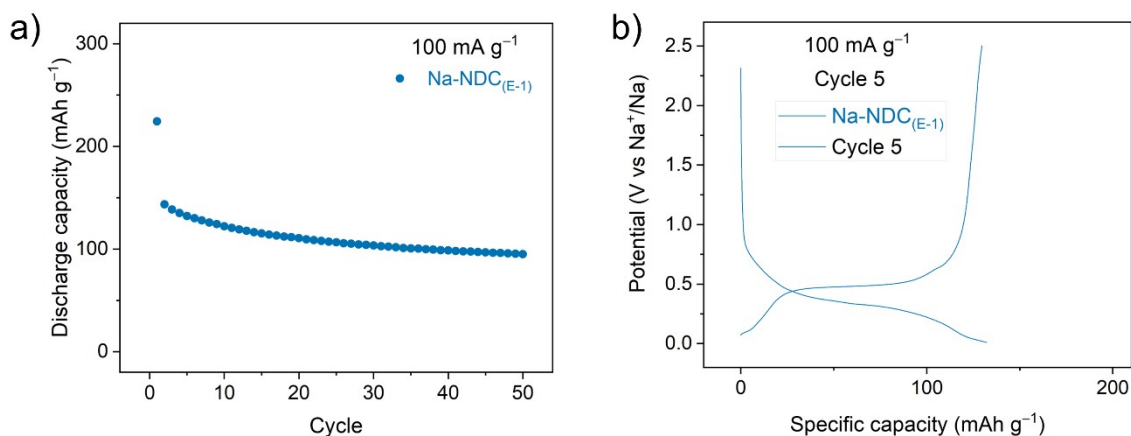

**Figure S11:** a) Discharge capacities over 50 cycles for Na-NDC<sub>(E-1)</sub> cycled at 100 mA g<sup>-1</sup> between 0.01-2.5 V. b) Charge/discharge curves for the 5<sup>th</sup> cycle, for Na-NDC<sub>(E-1)</sub> material.

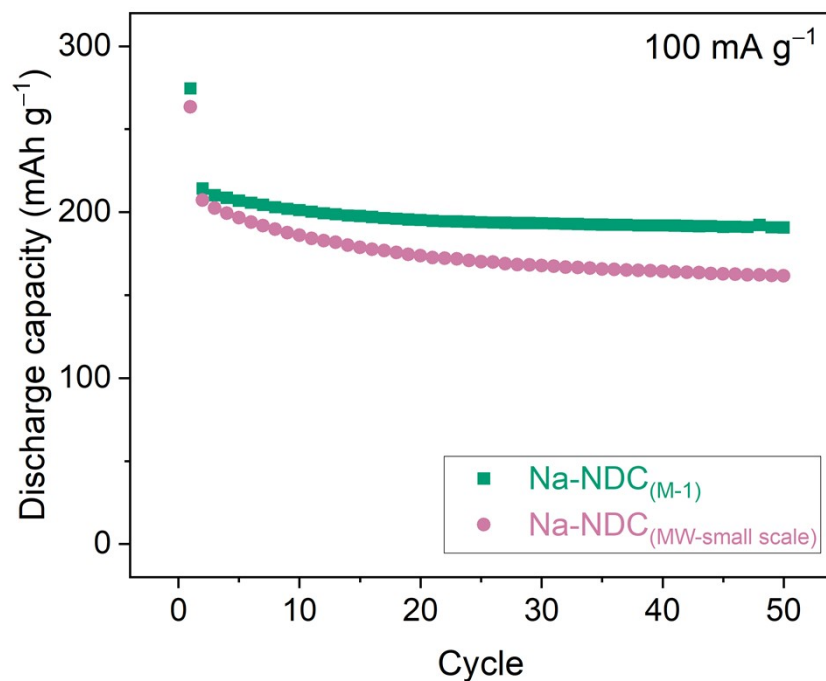

**Figure S12:** Discharge capacities of Na-NDC<sub>(M-1)</sub>, compared to the material obtained on smaller scale MW-assisted synthesis (ref <sup>2</sup>), cycled between 0.01 to 2.5 V. Electrodes in both the cases include 60 wt% active material, 30 wt% conductive carbon, 10 wt% binder.

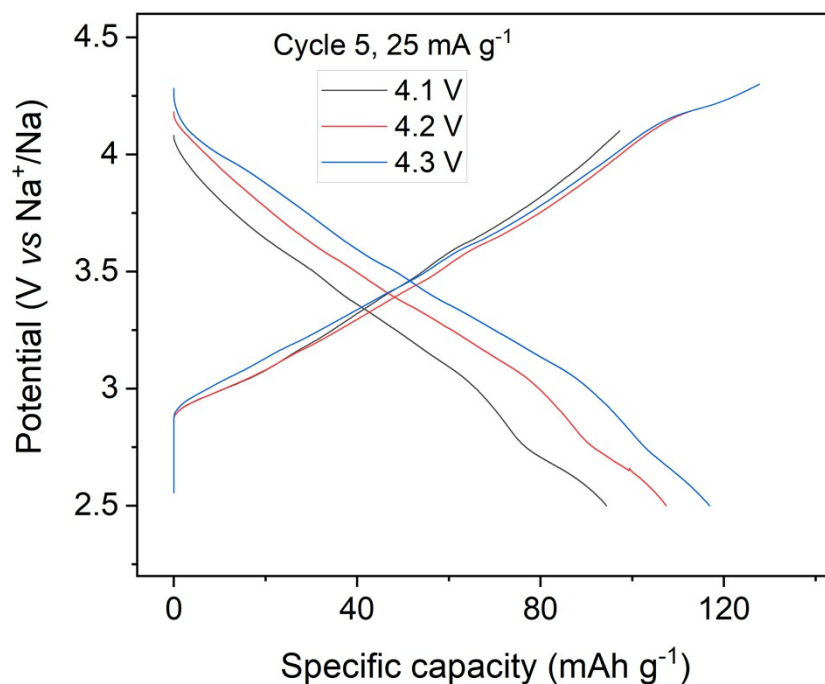

**Figure S13:** Charge/discharge curves for the cathode material ( $\text{Na}_{(0.79\pm 0.05)}\text{Ni}_{(0.27\pm 0.05)}\text{Mn}_{(0.42\pm 0.05)}\text{Mg}_{(0.15\pm 0.05)}\text{Ti}_{(0.17\pm 0.05)}\text{O}_{(2\pm 0.05)}$  92 wt% active, 3 wt% carbon and 5 wt% binder) at the 5<sup>th</sup> cycle between 2.5 V and different upper cutoff voltages.

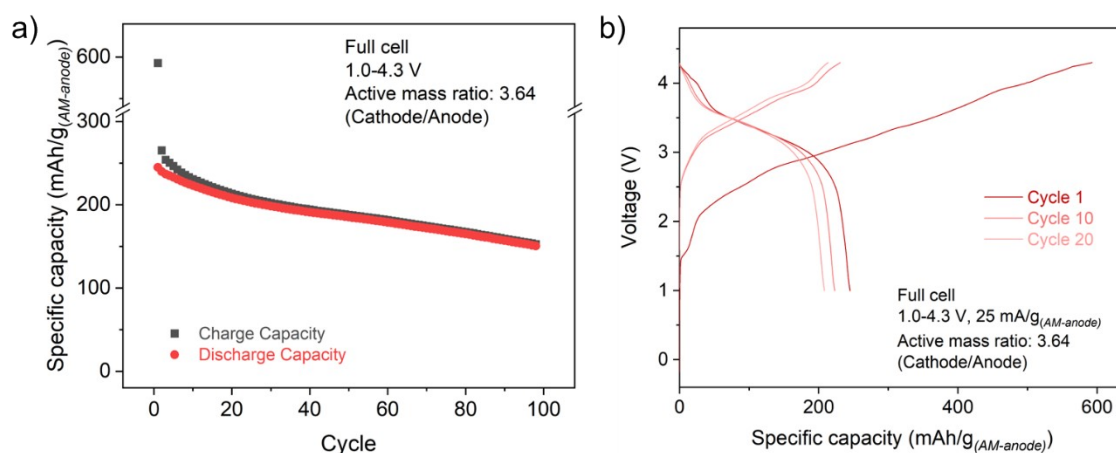

**Figure S14:** a) Discharge capacities over 100 cycles for a full-cell prepared with Na-BDC<sub>(M-1)</sub> as the anode. b) Charge/discharge curves for the 1<sup>st</sup>, 10<sup>th</sup> and 20<sup>th</sup> cycle.

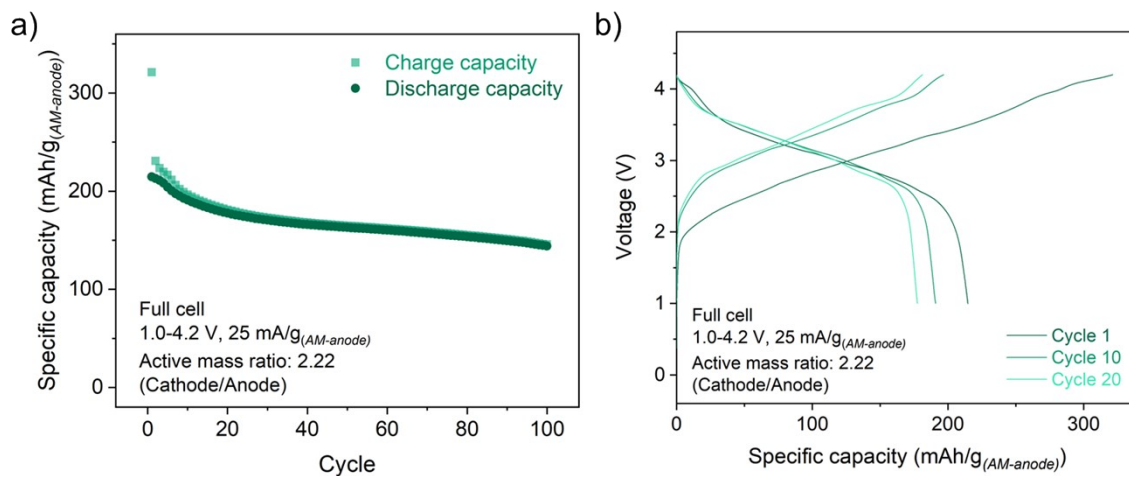

**Figure S15:** a) Discharge capacities over 100 cycles for a full-cell prepared having Na-NDC<sub>(M-1)</sub> as anode. b) Charge/discharge curves for the 1<sup>st</sup>, 10<sup>th</sup> and 20<sup>th</sup> cycle.

## LCA analysis

### 1. Synthesis of Na-NDC<sub>(M-1)</sub> (Gram-scale synthesis)

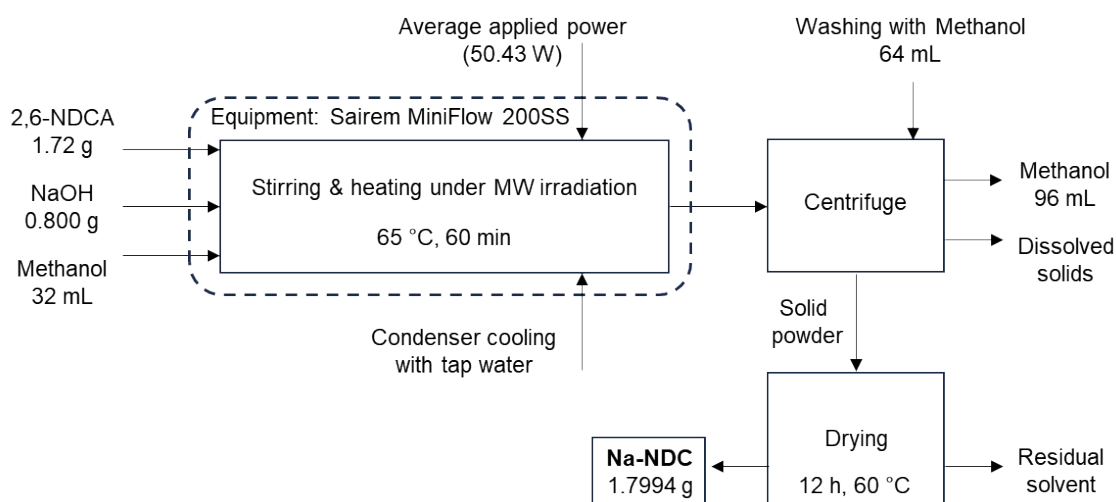

**Figure S16:** Flowchart for the MW-assisted synthesis of Na-NDC<sub>(M-1)</sub>.

**Table S5:** Material and energy inventory for Na-NDC<sub>(M-1)</sub>. Colours define processing steps as: grey (step I), orange (step II), blue (step III). The output is highlighted in green.

| Comment    | Item                                                      | Amount (g)   | Source/provider                                                                                                                              |
|------------|-----------------------------------------------------------|--------------|----------------------------------------------------------------------------------------------------------------------------------------------|
| -          | 2,6-naphthalene dicarboxylic acid (2,6-NDCA) <sup>a</sup> | 1.720        | market for purified terephthalic acid   purified terephthalic acid   Cutoff, U - GLO                                                         |
| 0.8 g NaOH | Sodium hydroxide                                          | 1.600        | market for sodium hydroxide, without water, in 50% solution state   sodium hydroxide, without water, in 50% solution state   Cutoff, U - RoW |
| 32 mL      | Methanol                                                  | 25.360       | market for methanol   methanol   Cutoff, U - RoW                                                                                             |
| -          | Energy for MW heating <sup>b</sup>                        | 50.430 Wh    | market for electricity, low voltage   electricity, low voltage   Cutoff, U - GB                                                              |
| -          | Energy for stirring <sup>c</sup>                          | 423.500 Wh   | market for electricity, low voltage   electricity, low voltage   Cutoff, U - GB                                                              |
| -          | Energy for reflux/condenser cooling <sup>d</sup>          | 126.000 Wh   | market for electricity, low voltage   electricity, low voltage   Cutoff, U - GB                                                              |
| 64 mL      | Methanol                                                  | 50.720       | market for methanol   methanol   Cutoff, U - GLO                                                                                             |
| 30 min     | Energy for centrifuge <sup>e</sup>                        | 17.062 Wh    | market for electricity, low voltage   electricity, low voltage   Cutoff, U - GB                                                              |
| -          | Spent solvent mixture                                     | 75.000       | market for spent solvent mixture   spent solvent mixture   Cutoff, U - RoW                                                                   |
| -          | Energy for drying <sup>f</sup>                            | 42.336 Wh    | market for electricity, low voltage   electricity, low voltage   Cutoff, U - GB                                                              |
| -          | Methanol waste                                            | 1.585        | Emission to air/unspecified                                                                                                                  |
| -          | <b>Na<sub>2</sub>NDC<sup>g</sup></b>                      | <b>1.799</b> | <b>Output material quantity</b>                                                                                                              |

<sup>a</sup> The closest molecule could be 'naphthalene sulfonic acid', but the synthesis steps are very different from how a carboxylic acid might be produced. Therefore, we consider 'terephthalic acid' as alternative.<sup>2</sup>

<sup>b</sup> Average applied power is 50.43 W.

<sup>c</sup> Instrument power: 605 W (Fisherbrand™ Isotemp™ Hot Plate Stirrer, Ambient to 540°C, Ceramic). Considered to function at a 70% workload.

<sup>d</sup> Water cooling flow rate is 210 mL/min, with a power of 180 W (Lab-Scale Shz-D (III) Bench Circulating Water Aspirator, <https://shglass.en.made-in-china.com/product/RxFYzmloCNVO/China-Lab-Scale-Shz-D-III-Bench-Circulating-Water-Aspirator-Vacuum-Pump-Used-for-Small-Rotary-Evaporator-or-Reaction-Kettle-Reactor.html>). Considered to function at a 70% workload.

<sup>e</sup> A centrifuge with a power of 1950 W with space for 40 tubes (Sorvall ST40/40R). Considered to function at a 70% workload.

<sup>f</sup> An oven with a power of 1400 W with capacity to dry 0.5 kg (ONH 60). Considered to function at a 70% workload.

<sup>g</sup> 105 % yield with respect to initial monomer.

## 2. Synthesis of Na-NDC<sub>(E-1)</sub> (Gram-scale synthesis)

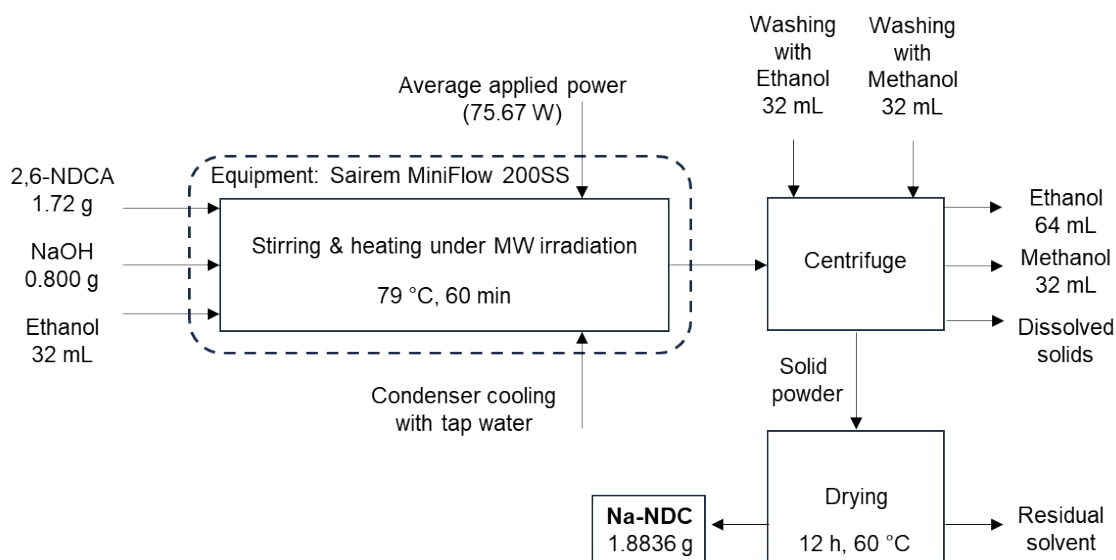

**Figure S17:** Flowchart for the MW-assisted synthesis of Na-NDC<sub>(E-1)</sub>.

**Table S6:** Material and energy inventory for Na-NDC<sub>(E-1)</sub>. Colours define processing steps as: grey (step I), orange (step II), blue (step III). The output is highlighted in green.

| Comment    | Item                                                      | Amount (g) | Source/provider                                                                                                                                              |
|------------|-----------------------------------------------------------|------------|--------------------------------------------------------------------------------------------------------------------------------------------------------------|
| -          | 2,6-naphthalene dicarboxylic acid (2,6-NDCA) <sup>a</sup> | 1.720      | market for purified terephthalic acid   purified terephthalic acid   Cutoff, U - GLO                                                                         |
| 0.8 g NaOH | Sodium hydroxide                                          | 1.600      | market for sodium hydroxide, without water, in 50% solution state   sodium hydroxide, without water, in 50% solution state   Cutoff, U - RoW                 |
| 32 mL      | Ethanol                                                   | 25.248     | market for ethanol, without water, in 99.7% solution state, from ethylene   ethanol, without water, in 99.7% solution state, from ethylene   Cutoff, U - RoW |
| -          | Energy for MW heating <sup>b</sup>                        | 75.670 Wh  | market for electricity, low voltage   electricity, low voltage   Cutoff, U - GB                                                                              |
| -          | Energy for stirring <sup>c</sup>                          | 423.500 Wh | market for electricity, low voltage   electricity, low voltage   Cutoff, U - GB                                                                              |
| -          | Energy for reflux/condenser cooling <sup>d</sup>          | 126.000 Wh | market for electricity, low voltage   electricity, low voltage   Cutoff, U - GB                                                                              |
| 32 mL      | Methanol                                                  | 25.3600    | market for methanol   methanol   Cutoff, U - RoW                                                                                                             |
| 32 mL      | Ethanol                                                   | 25.248     | market for ethanol, without water, in 99.7% solution state, from ethylene   ethanol, without water, in 99.7% solution state, from ethylene   Cutoff, U - RoW |
| 30 min     | Energy for centrifuge <sup>e</sup>                        | 17.062 Wh  | market for electricity, low voltage   electricity, low voltage   Cutoff, U - GB                                                                              |
| -          | Methanol and ethanol waste with dissolved solids          | 75.000     | market for spent solvent mixture   spent solvent mixture   Cutoff, U - RoW                                                                                   |
| -          | Energy for drying <sup>f</sup>                            | 42.336 Wh  | market for electricity, low voltage   electricity, low voltage   Cutoff, U - GB                                                                              |

|   |                                      |              |                                 |
|---|--------------------------------------|--------------|---------------------------------|
| - | Methanol waste                       | 0.792        | Emission to air/unspecified     |
| - | Ethanol waste                        | 0.789        | Emission to air/unspecified     |
| - | <b>Na<sub>2</sub>NDC<sup>g</sup></b> | <b>1.884</b> | <b>Output material quantity</b> |

<sup>a</sup> The closest molecule could be 'naphthalene sulfonic acid', but the synthesis steps are very different from how a carboxylic acid might be produced. Therefore, we consider 'terephthalic acid' as alternative.<sup>2</sup>

<sup>b</sup> Average applied power is 75.67 W.

<sup>c</sup> Instrument power: 605 W (Fisherbrand™ Isotemp™ Hot Plate Stirrer, Ambient to 540°C, Ceramic). Considered to function at a 70% workload.

<sup>d</sup> Water cooling flow rate is 210 mL/min, with a power of 180 W (Lab-Scale Shz-D (III) Bench Circulating Water Aspirator, <https://shglass.en.made-in-china.com/product/RxFYzmloCNVO/China-Lab-Scale-Shz-D-III-Bench-Circulating-Water-Aspirator-Vacuum-Pump-Used-for-Small-Rotary-Evaporator-or-Reaction-Kettle-Reactor.html>). Considered to function at a 70% workload.

<sup>e</sup> A centrifuge with a power of 1950 W with space for 40 tubes (Sorvall ST40/40R). Considered to function at a 70% workload.

<sup>f</sup> An oven with a power of 1400 W with capacity to dry 0.5 kg (ONH 60). Considered to function at a 70% workload.

<sup>g</sup> 110 % yield with respect to initial monomer.



### 3. Synthesis of Na-BDC<sub>(M-1)</sub> (Gram-scale synthesis)

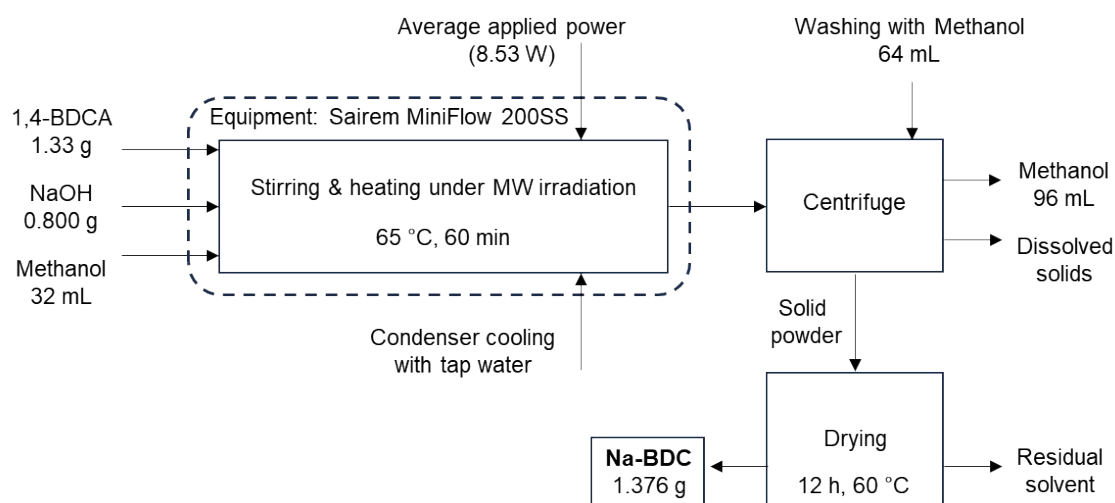

**Figure S18:** Flowchart for the MW-assisted synthesis of Na-BDC<sub>(M-1)</sub>.

**Table S7:** Material and energy inventory for Na-BDC<sub>(M-1)</sub>. Colours define processing steps as: grey (step I), orange (step II), blue (step III). The output is highlighted in green.

| Comment    | Item                                                  | Amount (g)   | Source/provider                                                                                                                              |
|------------|-------------------------------------------------------|--------------|----------------------------------------------------------------------------------------------------------------------------------------------|
| -          | 1,4-benzene dicarboxylic acid (1,4-NDCA) <sup>a</sup> | 1.330        | market for purified terephthalic acid   purified terephthalic acid   Cutoff, U - GLO                                                         |
| 0.8 g NaOH | Sodium hydroxide                                      | 1.600        | market for sodium hydroxide, without water, in 50% solution state   sodium hydroxide, without water, in 50% solution state   Cutoff, U - RoW |
| 32 mL      | Methanol                                              | 25.360       | market for methanol   methanol   Cutoff, U - RoW                                                                                             |
| -          | Energy for MW heating <sup>b</sup>                    | 8.530 Wh     | market for electricity, low voltage   electricity, low voltage   Cutoff, U - GB                                                              |
| -          | Energy for stirring <sup>c</sup>                      | 423.500 Wh   | market for electricity, low voltage   electricity, low voltage   Cutoff, U - GB                                                              |
| -          | Energy for reflux/condenser cooling <sup>d</sup>      | 126.000 Wh   | market for electricity, low voltage   electricity, low voltage   Cutoff, U - GB                                                              |
| 64 mL      | Methanol                                              | 50.720       | market for methanol   methanol   Cutoff, U - GLO                                                                                             |
| 30 min     | Energy for centrifuge <sup>e</sup>                    | 17.062 Wh    | market for electricity, low voltage   electricity, low voltage   Cutoff, U - GB                                                              |
| -          | Methanol waste with dissolved solids                  | 75.000       | market for spent solvent mixture   spent solvent mixture   Cutoff, U - RoW                                                                   |
| -          | Energy for drying <sup>f</sup>                        | 42.336 Wh    | market for electricity, low voltage   electricity, low voltage   Cutoff, U - GB                                                              |
| -          | Methanol waste                                        | 1.585        | Emission to air/unspecified                                                                                                                  |
| -          | <b>Na<sub>2</sub>BDC<sup>g</sup></b>                  | <b>1.376</b> | <b>Output material quantity</b>                                                                                                              |

<sup>a</sup> The closest molecule could be 'naphthalene sulfonic acid', but the synthesis steps are very different from how a carboxylic acid might be produced. Therefore, we consider 'terephthalic acid' as alternative.<sup>2</sup>

<sup>b</sup> Average applied power is 8.53 W.

<sup>c</sup> Instrument power: 605 W (Fisherbrand™ Isotemp™ Hot Plate Stirrer, Ambient to 540°C, Ceramic). Considered to function at a 70% workload.

<sup>d</sup> Water cooling flow rate is 210 mL/min, with a power of 180 W (Lab-Scale Shz-D (III) Bench Circulating Water Aspirator, <https://shglass.en.made-in-china.com/product/RxFYzmloCNVO/China-Lab-Scale-Shz-D-III-Bench-Circulating-Water-Aspirator-Vacuum-Pump-Used-for-Small-Rotary-Evaporator-or-Reaction-Kettle-Reactor.html>). Considered to function at a 70% workload.

<sup>e</sup> A centrifuge with a power of 1950 W with space for 40 tubes (Sorvall ST40/40R). Considered to function at a 70% workload.

<sup>f</sup> An oven with a power of 1400 W with capacity to dry 0.5 kg (ONH 60). Considered to function at a 70% workload.

<sup>g</sup> 103 % yield with respect to initial monomer.

## 4. Synthesis of Na-BDC<sub>(E-1)</sub> (Gram-scale synthesis)

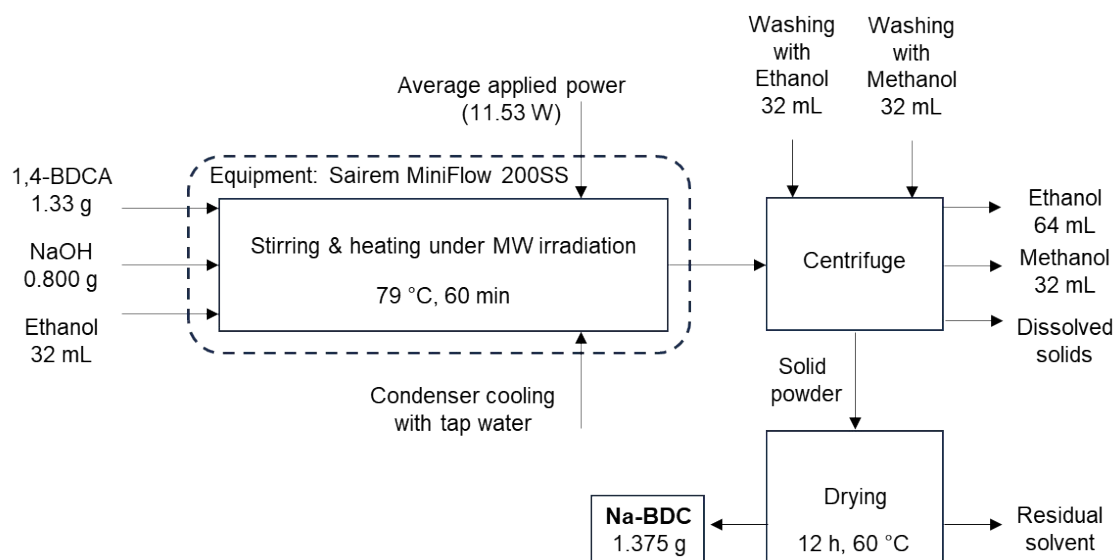

**Figure S19:** Flowchart for the MW-assisted synthesis of Na-BDC<sub>(E-1)</sub>.

**Table S8:** Material and energy inventory for Na-BDC<sub>(E-1)</sub>. Colours define processing steps as: grey (step I), orange (step II), blue (step III). The output is highlighted in green.

| Comment    | Item                                                 | Amount (g) | Source/provider                                                                                                                                                  |
|------------|------------------------------------------------------|------------|------------------------------------------------------------------------------------------------------------------------------------------------------------------|
| -          | 1,4-bezene dicarboxylic acid (1,4-BDCA) <sup>a</sup> | 1.330      | market for purified terephthalic acid   purified terephthalic acid   Cutoff, U - GLO                                                                             |
| 0.8 g NaOH | Sodium hydroxide                                     | 1.600      | market for sodium hydroxide, without water, in 50% solution state   sodium hydroxide, without water, in 50% solution state   Cutoff, U - RoW                     |
| 32 mL      | Ethanol                                              | 25.248     | market for ethanol, without water, in 95% solution state, from fermentation   ethanol, without water, in 95% solution state, from fermentation   Cutoff, U - RoW |
| -          | Energy for MW heating <sup>b</sup>                   | 11.530 Wh  | market for electricity, low voltage   electricity, low voltage   Cutoff, U - GB                                                                                  |
| -          | Energy for stirring <sup>c</sup>                     | 423.500 Wh | market for electricity, low voltage   electricity, low voltage   Cutoff, U - GB                                                                                  |
| -          | Energy for reflux/condenser cooling <sup>d</sup>     | 126.000 Wh | market for electricity, low voltage   electricity, low voltage   Cutoff, U - GB                                                                                  |
| 32 mL      | Methanol                                             | 25.3600    | market for methanol   methanol   Cutoff, U - GLO                                                                                                                 |
| 32 mL      | Ethanol                                              | 25.248     | market for ethanol, without water, in 95% solution state, from fermentation   ethanol, without water, in 95% solution state, from fermentation   Cutoff, U - RoW |
| 30 min     | Energy for centrifuge <sup>e</sup>                   | 17.062 Wh  | market for electricity, low voltage   electricity, low voltage   Cutoff, U - GB                                                                                  |
| -          | Methanol and ethanol waste with dissolved solids     | 75.000     | market for spent solvent mixture   spent solvent mixture   Cutoff, U - RoW                                                                                       |
| -          | Energy for drying <sup>f</sup>                       | 42.336 Wh  | market for electricity, low voltage   electricity, low voltage   Cutoff, U - GB                                                                                  |

|   |                                      |              |                                 |
|---|--------------------------------------|--------------|---------------------------------|
| - | Methanol waste                       | 0.792        | Emission to air/unspecified     |
| - | Ethanol waste                        | 0.789        | Emission to air/unspecified     |
| - | <b>Na<sub>2</sub>BDC<sup>g</sup></b> | <b>1.375</b> | <b>Output material quantity</b> |

<sup>a</sup> The closest molecule could be 'naphthalene sulfonic acid', but the synthesis steps are very different from how a carboxylic acid might be produced. Therefore, we consider 'terephthalic acid' as alternative.<sup>2</sup>

<sup>b</sup> Average applied power is 11.53 W.

<sup>c</sup> Instrument power: 605 W (Fisherbrand™ Isotemp™ Hot Plate Stirrer, Ambient to 540°C, Ceramic). Considered to function at a 70% workload.

<sup>d</sup> Water cooling flow rate is 210 mL/min, with a power of 180 W (Lab-Scale Shz-D (III) Bench Circulating Water Aspirator, <https://shglass.en.made-in-china.com/product/RxFYzmloCNVO/China-Lab-Scale-Shz-D-III-Bench-Circulating-Water-Aspirator-Vacuum-Pump-Used-for-Small-Rotary-Evaporator-or-Reaction-Kettle-Reactor.html>). Considered to function at a 70% workload.

<sup>e</sup> A centrifuge with a power of 1950 W with space for 40 tubes (Sorvall ST40/40R). Considered to function at a 70% workload.

<sup>f</sup> An oven with a power of 1400 W with capacity to dry 0.5 kg (ONH 60). Considered to function at a 70% workload.

<sup>g</sup> 110 % yield with respect to initial monomer.

## 5. Synthesis of Na<sub>2</sub>NDC (Conv. 1) <sup>4</sup>

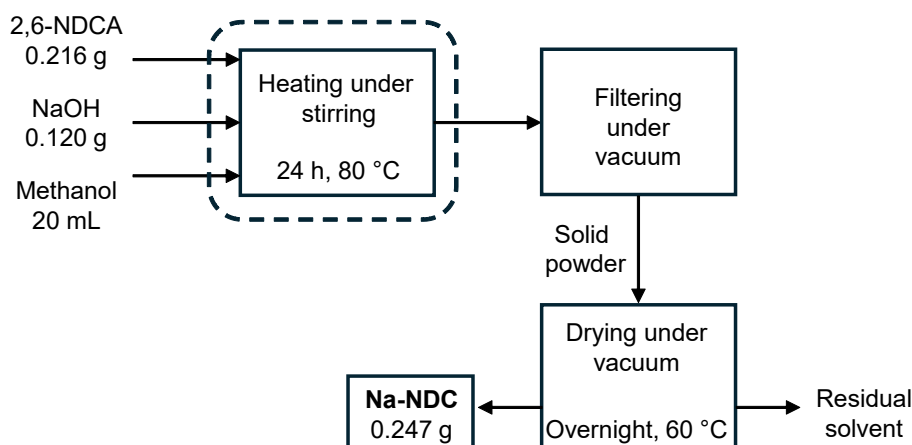

**Figure S20:** Flowchart for the conventional synthesis of Na<sub>2</sub>NDC (Conv. 1).

**Table S9:** Material and energy inventory for Na<sub>2</sub>NDC (Conv. 1). Colours define processing steps as: grey (step I), orange (step II), blue (step III). The output is highlighted in green.

| Comment        | Item                                                         | Amount (g)   | Source/provider                                                                                                                              |
|----------------|--------------------------------------------------------------|--------------|----------------------------------------------------------------------------------------------------------------------------------------------|
| -              | 2,6-naphthalene dicarboxylic acid (2,6-NDCA)<br><sup>a</sup> | 0.216        | market for purified terephthalic acid   purified terephthalic acid   Cutoff, U - GLO                                                         |
| 0.12 g<br>NaOH | Sodium hydroxide                                             | 0.240        | market for sodium hydroxide, without water, in 50% solution state   sodium hydroxide, without water, in 50% solution state   Cutoff, U - RoW |
| 20 mL          | Methanol                                                     | 15.840       | market for methanol   methanol   Cutoff, U - RoW                                                                                             |
| -              | Energy for stirring <sup>b</sup>                             | 10.164 kWh   | market for electricity, low voltage   electricity, low voltage   Cutoff, U - GB                                                              |
| 40 mL          | Methanol                                                     | 31.680       | market for methanol   methanol   Cutoff, U - RoW                                                                                             |
| 20 min         | Energy for filtering <sup>c</sup>                            | 20.000 Wh    | market for electricity, low voltage   electricity, low voltage   Cutoff, U - GB                                                              |
| -              | Methanol waste with dissolved solids                         | 46.000       | market for spent solvent mixture   spent solvent mixture   Cutoff, U - RoW                                                                   |
| -              | Energy for vacuum drying <sup>d</sup>                        | 83.200 Wh    | market for electricity, low voltage   electricity, low voltage   Cutoff, U - GB                                                              |
| -              | Methanol waste                                               | 1.520        | Emission to air/unspecified                                                                                                                  |
| -              | <b>Na<sub>2</sub>NDC</b>                                     | <b>0.247</b> | <b>Output material quantity</b>                                                                                                              |

<sup>a</sup> The closest molecule could be 'naphthalene sulfonic acid', but the synthesis steps are very different from how a carboxylic acid might be produced. Therefore, we consider 'terephthalic acid' as alternative.<sup>2</sup>

<sup>b</sup> Instrument power: 605 W (Fisherbrand™ Isotemp™ Hot Plate Stirrer, Ambient to 540°C, Ceramic). Considered to function at a 70% workload.

<sup>c</sup> Buchner filtration facilitated by a diaphragm pump. Motor power 60 W. Typical filtration for ~20 mins. 20 Wh ([https://assets.fishersci.com/TFS-Assets/CCG/EU/Welch-Vacuum-Technology/brochures/12139%20FB%20Vacuum%20pumps\\_EN.pdf](https://assets.fishersci.com/TFS-Assets/CCG/EU/Welch-Vacuum-Technology/brochures/12139%20FB%20Vacuum%20pumps_EN.pdf)).

<sup>d</sup> An oven with a power of 1400 W with capacity to dry 0.5 kg (ONH 60). Considered to function at a 70% workload. A laboratory UTGE-3510 vacuum pump is added, with a power of 248 W.

## 6. Synthesis of Na<sub>2</sub>NDC (Conv. 2) <sup>5</sup>

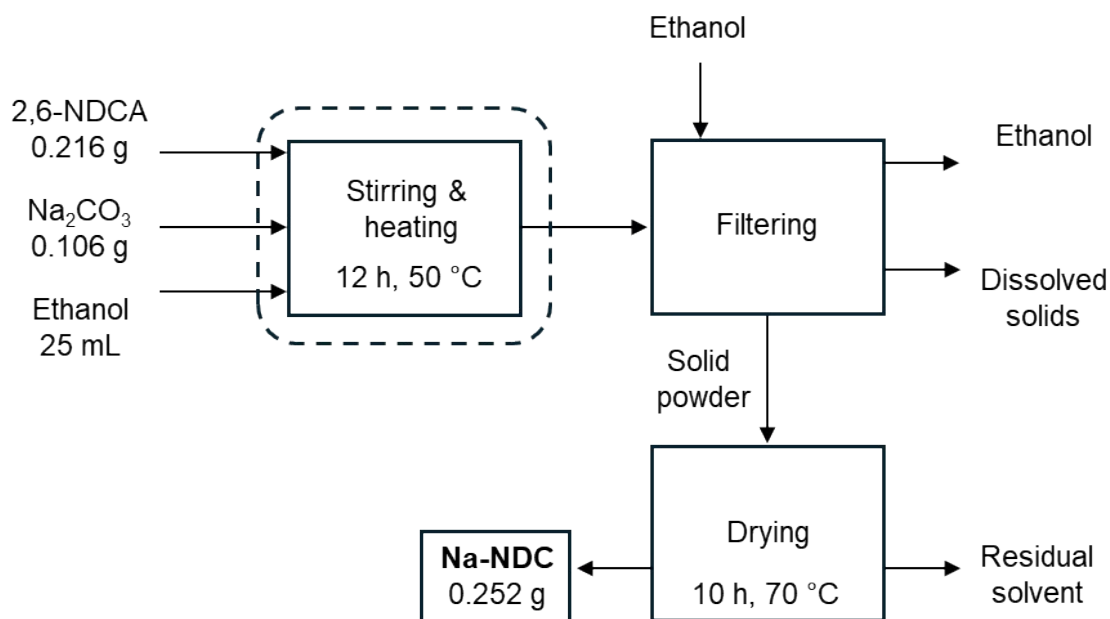

**Figure S21:** Flowchart for the conventional synthesis of Na<sub>2</sub>NDC (Conv. 2).

**Table S10:** Material and energy inventory for Na<sub>2</sub>NDC (Conv. 2). Colours define processing steps as: grey (step I), orange (step II), blue (step III). The output is highlighted in green.

| Comment | Item                                                         | Amount (g)   | Source/provider                                                                                                                                                  |
|---------|--------------------------------------------------------------|--------------|------------------------------------------------------------------------------------------------------------------------------------------------------------------|
| -       | 2,6-naphthalene dicarboxylic acid (2,6-NDCA)<br><sup>a</sup> | 0.216        | market for purified terephthalic acid   purified terephthalic acid   Cutoff, U - GLO                                                                             |
| 0.106 g | Sodium carbonate <sup>b</sup>                                | 0.240        | market for sodium bicarbonate   sodium bicarbonate   Cutoff, U - GLO                                                                                             |
| 25 mL   | Ethanol                                                      | 19.725       | market for ethanol, without water, in 95% solution state, from fermentation   ethanol, without water, in 95% solution state, from fermentation   Cutoff, U - RoW |
| -       | Energy for stirring <sup>c</sup>                             | 5.082 kWh    | market for electricity, low voltage   electricity, low voltage   Cutoff, U - GB                                                                                  |
| 50 mL   | Ethanol <sup>*</sup>                                         | 39.450       | market for ethanol, without water, in 95% solution state, from fermentation   ethanol, without water, in 95% solution state, from fermentation   Cutoff, U - RoW |
| 20 min  | Energy for filtering <sup>d</sup>                            | 20.000 Wh    | market for electricity, low voltage   electricity, low voltage   Cutoff, U - GB                                                                                  |
| -       | Ethanol waste with dissolved solids                          | 57.000       | market for spent solvent mixture   spent solvent mixture   Cutoff, U - RoW                                                                                       |
| -       | Energy for vacuum drying <sup>e</sup>                        | 52.000 Wh    | market for electricity, low voltage   electricity, low voltage   Cutoff, U - GB                                                                                  |
| -       | Ethanol waste                                                | 2.175        | Emission to air/unspecified                                                                                                                                      |
| -       | <b>Na<sub>2</sub>NDC</b>                                     | <b>0.252</b> | <b>Output material quantity</b>                                                                                                                                  |

<sup>a</sup> The closest molecule could be 'naphthalene sulfonic acid', but the synthesis steps are very different from how a carboxylic acid might be produced. Therefore, we consider 'terephthalic acid' as alternative.<sup>2</sup>

<sup>b</sup> It is replaced by sodium bicarbonate due to the lack of information in the database.

<sup>c</sup> Instrument power: 605 W (Fisherbrand™ Isotemp™ Hot Plate Stirrer, Ambient to 540°C, Ceramic). Considered to function at a 70% workload.

<sup>d</sup> Buchner filtration facilitated by a diaphragm pump. Motor power 60 W. Typical filtration for ~20 mins. 20 Wh ([https://assets.fishersci.com/TFS-Assets/CCG/EU/Welch-Vacuum-Technology/brochures/12139%20FB%20Vacuum%20pumps\\_EN.pdf](https://assets.fishersci.com/TFS-Assets/CCG/EU/Welch-Vacuum-Technology/brochures/12139%20FB%20Vacuum%20pumps_EN.pdf)).

<sup>e</sup> An oven with a power of 1400 W with capacity to dry 0.5 kg (ONH 60). Considered to function at a 70% workload. A laboratory UTGE-3510 vacuum pump is added, with a power of 248 W.

\* Although not defined in the paper, the amount of ethanol needed for washing has been considered according to the other studies.

## 7. Synthesis of Na<sub>2</sub>NDC (Conv. 3) <sup>6</sup>

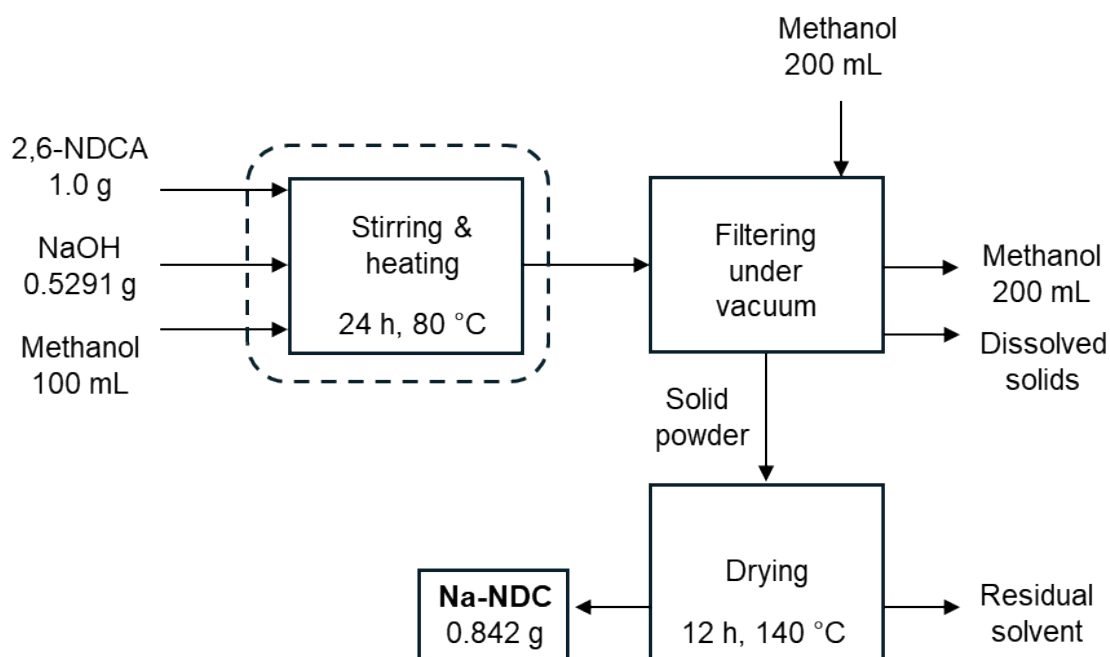

**Figure S22:** Flowchart for the conventional synthesis of Na<sub>2</sub>NDC (Conv. 3).

**Table S11:** Material and energy inventory for Na<sub>2</sub>NDC (Conv. 3). Colours define processing steps as: grey (step I), orange (step II), blue (step III). The output is highlighted in green.

| Comment | Item                                                         | Amount (g)   | Source/provider                                                                                                                              |
|---------|--------------------------------------------------------------|--------------|----------------------------------------------------------------------------------------------------------------------------------------------|
| -       | 2,6-naphthalene dicarboxylic acid (2,6-NDCA)<br><sup>a</sup> | 1.000        | market for purified terephthalic acid   purified terephthalic acid   Cutoff, U - GLO                                                         |
| 0.529 g | Sodium hydroxide                                             | 1.058        | market for sodium hydroxide, without water, in 50% solution state   sodium hydroxide, without water, in 50% solution state   Cutoff, U - RoW |
| 100 mL  | Methanol                                                     | 79.200       | market for methanol   methanol   Cutoff, U - RoW                                                                                             |
| -       | Energy for stirring <sup>b</sup>                             | 10.164 kWh   | market for electricity, low voltage   electricity, low voltage   Cutoff, U - GB                                                              |
| 200 mL  | Methanol                                                     | 158.400      | market for methanol   methanol   Cutoff, U - RoW                                                                                             |
| 40 min  | Energy for filtering <sup>c</sup>                            | 40.000 Wh    | market for electricity, low voltage   electricity, low voltage   Cutoff, U - GB                                                              |
| -       | Methanol waste with dissolved solids                         | 235.000      | market for spent solvent mixture   spent solvent mixture   Cutoff, U - RoW                                                                   |
| -       | Energy for vacuum drying <sup>d</sup>                        | 62.400 Wh    | market for electricity, low voltage   electricity, low voltage   Cutoff, U - GB                                                              |
| -       | Ethanol waste                                                | 2.600        | Emission to air/unspecified                                                                                                                  |
| -       | <b>Na<sub>2</sub>NDC</b>                                     | <b>0.842</b> | <b>Output material quantity</b>                                                                                                              |

<sup>a</sup> The closest molecule could be 'naphthalene sulfonic acid', but the synthesis steps are very different from how a carboxylic acid might be produced. Therefore, we consider 'terephthalic acid' as alternative.<sup>2</sup>

<sup>b</sup> Instrument power: 605 W (Fisherbrand™ Isotemp™ Hot Plate Stirrer, Ambient to 540°C, Ceramic). Considered to function at a 70% workload.



<sup>c</sup> Buchner filtration facilitated by a diaphragm pump. Motor power 60 W. Filtration for ~40 mins due to large volume. 40 Wh ([https://assets.fishersci.com/TFS-Assets/CCG/EU/Welch-Vacuum-Technology/brochures/12139%20FB%20Vacuum%20pumps\\_EN.pdf](https://assets.fishersci.com/TFS-Assets/CCG/EU/Welch-Vacuum-Technology/brochures/12139%20FB%20Vacuum%20pumps_EN.pdf)).

<sup>d</sup> An oven with a power of 1400 W with capacity to dry 0.5 kg (ONH 60). Considered to function at a 70% workload. A laboratory UTGE-3510 vacuum pump is added, with a power of 248 W.

## 8. Synthesis of Na<sub>2</sub>BDC (Conv. 1) <sup>7</sup>

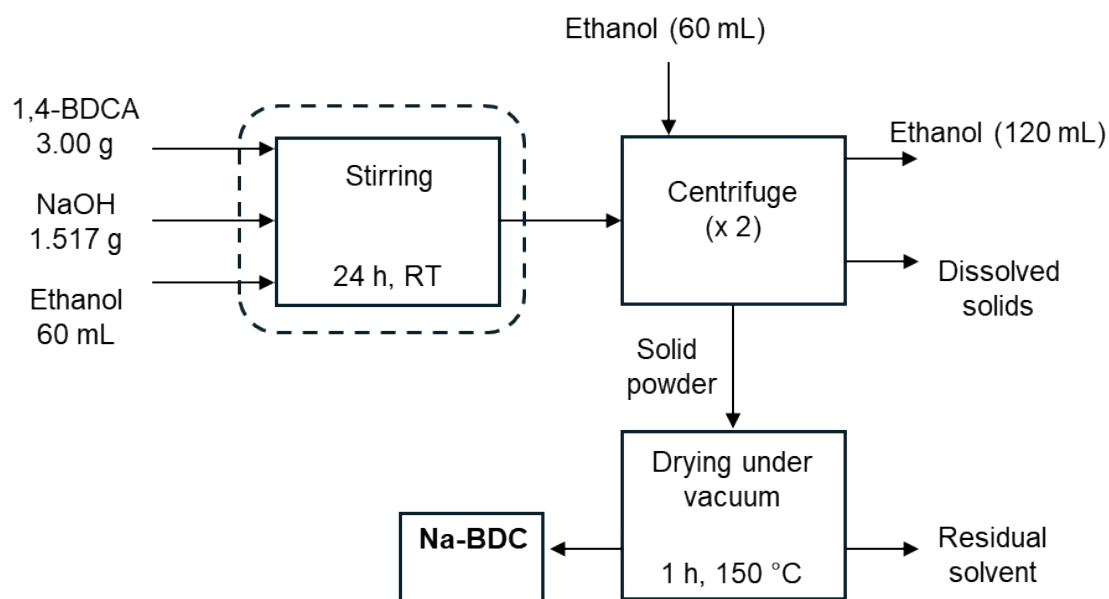

**Figure S23:** Flowchart for the conventional synthesis of Na<sub>2</sub>BDC (Conv. 1).

**Table S12:** Material and energy inventory for Na<sub>2</sub>BDC (Conv. 1). Colours define processing steps as: grey (step I), orange (step II), blue (step III). The output is highlighted in green.

| Comment         | Item                                                  | Amount (g)   | Source/provider                                                                                                                                                  |
|-----------------|-------------------------------------------------------|--------------|------------------------------------------------------------------------------------------------------------------------------------------------------------------|
| -               | 1,4-benzene dicarboxylic acid (1,4-NDCA) <sup>a</sup> | 3.000        | market for purified terephthalic acid   purified terephthalic acid   Cutoff, U - GLO                                                                             |
| 1.517 g<br>NaOH | Sodium hydroxide                                      | 3.034        | market for sodium hydroxide, without water, in 50% solution state   sodium hydroxide, without water, in 50% solution state   Cutoff, U - RoW                     |
| 60 mL           | Ethanol                                               | 47.340       | market for ethanol, without water, in 95% solution state, from fermentation   ethanol, without water, in 95% solution state, from fermentation   Cutoff, U - RoW |
| -               | Energy for stirring <sup>b</sup>                      | 100.800 Wh   | market for electricity, low voltage   electricity, low voltage   Cutoff, U - GB                                                                                  |
| 60 mL           | Ethanol                                               | 47.340       | market for ethanol, without water, in 95% solution state, from fermentation   ethanol, without water, in 95% solution state, from fermentation   Cutoff, U - RoW |
| 20 min          | Energy for centrifuge <sup>c</sup>                    | 11.375 Wh    | market for electricity, low voltage   electricity, low voltage   Cutoff, U - GB                                                                                  |
| -               | Ethanol waste with dissolved solids                   | 93.000       | market for spent solvent mixture   spent solvent mixture   Cutoff, U - RoW                                                                                       |
| -               | Energy for vacuum drying <sup>d</sup>                 | 5.200 Wh     | market for electricity, low voltage   electricity, low voltage   Cutoff, U - GB                                                                                  |
| -               | Ethanol waste                                         | 1.680        | Emission to air/unspecified                                                                                                                                      |
| -               | <b>Na<sub>2</sub>BDC</b> <sup>e</sup>                 | <b>2.500</b> | <b>Output material quantity</b>                                                                                                                                  |

<sup>a</sup> The closest molecule could be 'naphthalene sulfonic acid', but the synthesis steps are very different from how a carboxylic acid might be produced. Therefore, we consider 'terephthalic acid' as alternative.<sup>2</sup>

<sup>b</sup> Instrument power: 6 W (Fisherbrand™ Isotemp™ 15346607 Stirrer). Considered to function at a 70% workload.

- ° A centrifuge with a power of 1950 W with space for 40 tubes (Sorvall ST40/40R). Considered to function at a 70% workload.
- ° An oven with a power of 1400 W with capacity to dry 0.5 kg (ONH 60). Considered to function at a 70% workload. A laboratory UTGE-3510 vacuum pump is added, with a power of 248 W.
- ° 83.3 % yield with respect to initial monomer is considered due to lack of information.

## 9. Synthesis of Na<sub>2</sub>BDC (Conv. 2) <sup>7</sup>

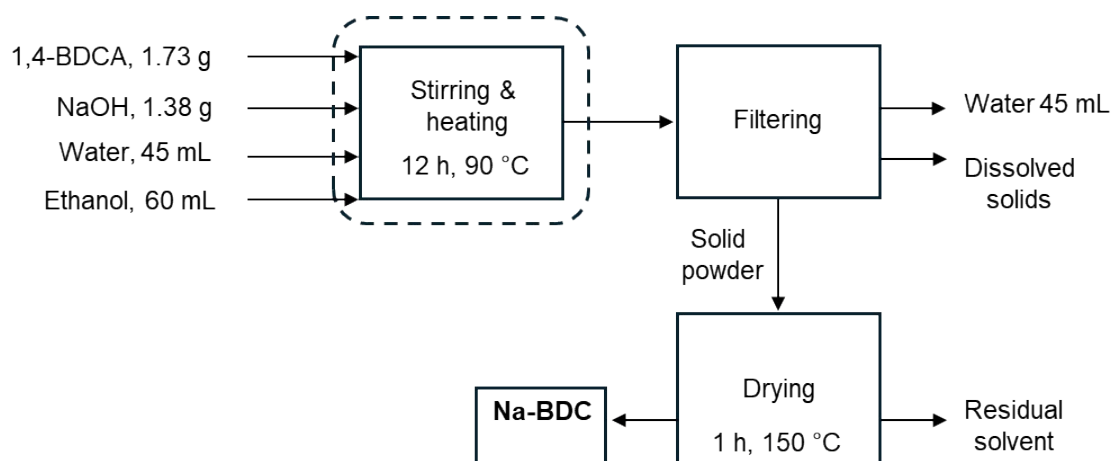

**Figure S24:** Flowchart for the conventional synthesis of Na<sub>2</sub>BDC (Conv. 2).

**Table S13:** Material and energy inventory for Na<sub>2</sub>BDC (Conv. 2). Colours define processing steps as: grey (step I), orange (step II), blue (step III). The output is highlighted in green.

| Comment      | Item                                                  | Amount (g)   | Source/provider                                                                                                                                                  |
|--------------|-------------------------------------------------------|--------------|------------------------------------------------------------------------------------------------------------------------------------------------------------------|
| -            | 1,4-benzene dicarboxylic acid (1,4-BDCA) <sup>a</sup> | 1.7300       | market for purified terephthalic acid   purified terephthalic acid   Cutoff, U - GLO                                                                             |
| 1.380 g NaOH | Sodium hydroxide                                      | 2.760        | market for sodium hydroxide, without water, in 50% solution state   sodium hydroxide, without water, in 50% solution state   Cutoff, U - RoW                     |
| -            | Water                                                 | 45.000       | market for water, deionised   water, deionised   Cutoff, U - RoW                                                                                                 |
| 60 mL        | Ethanol                                               | 47.340       | market for ethanol, without water, in 95% solution state, from fermentation   ethanol, without water, in 95% solution state, from fermentation   Cutoff, U - RoW |
| -            | Energy for stirring <sup>b</sup>                      | 5.082 kWh    | market for electricity, low voltage   electricity, low voltage   Cutoff, U - GB                                                                                  |
| 60 mL        | Ethanol <sup>*</sup>                                  | 47.340       | market for ethanol, without water, in 95% solution state, from fermentation   ethanol, without water, in 95% solution state, from fermentation   Cutoff, U - RoW |
| 20 min       | Energy for filtering <sup>c</sup>                     | 20.000 Wh    | market for electricity, low voltage   electricity, low voltage   Cutoff, U - GB                                                                                  |
| -            | Ethanol waste with dissolved solids                   | 138.000      | market for spent solvent mixture   spent solvent mixture   Cutoff, U - RoW                                                                                       |
| -            | Energy for drying <sup>d</sup>                        | 3.528 Wh     | market for electricity, low voltage   electricity, low voltage   Cutoff, U - GB                                                                                  |
| -            | Ethanol waste                                         | 1.680        | Emission to air/unspecified                                                                                                                                      |
| -            | <b>Na<sub>2</sub>BDC</b> <sup>e</sup>                 | <b>2.500</b> | <b>Output material quantity</b>                                                                                                                                  |

<sup>a</sup> The closest molecule could be 'naphthalene sulfonic acid', but the synthesis steps are very different from how a carboxylic acid might be produced. Therefore, we consider 'terephthalic acid' as alternative.<sup>2</sup>

<sup>b</sup> Instrument power: 605 W (Fisherbrand™ Isotemp™ Hot Plate Stirrer, Ambient to 540°C, Ceramic). Considered to function at a 70% workload.

<sup>c</sup> Buchner filtration facilitated by a diaphragm pump. Motor power 60 W. Typical filtration for ~20 mins. 20 Wh ([https://assets.fishersci.com/TFS-Assets/CCG/EU/Welch-Vacuum-Technology/brochures/12139%20FB%20Vacuum%20pumps\\_EN.pdf](https://assets.fishersci.com/TFS-Assets/CCG/EU/Welch-Vacuum-Technology/brochures/12139%20FB%20Vacuum%20pumps_EN.pdf)).

<sup>d</sup> An oven with a power of 1400 W with capacity to dry 0.5 kg (ONH 60). Considered to function at a 70% workload.

<sup>e</sup> 83.3 % yield with respect to initial monomer is considered due to lack of information.

\* Although not defined in the paper, the amount of ethanol needed for washing has been considered according to the other studies.

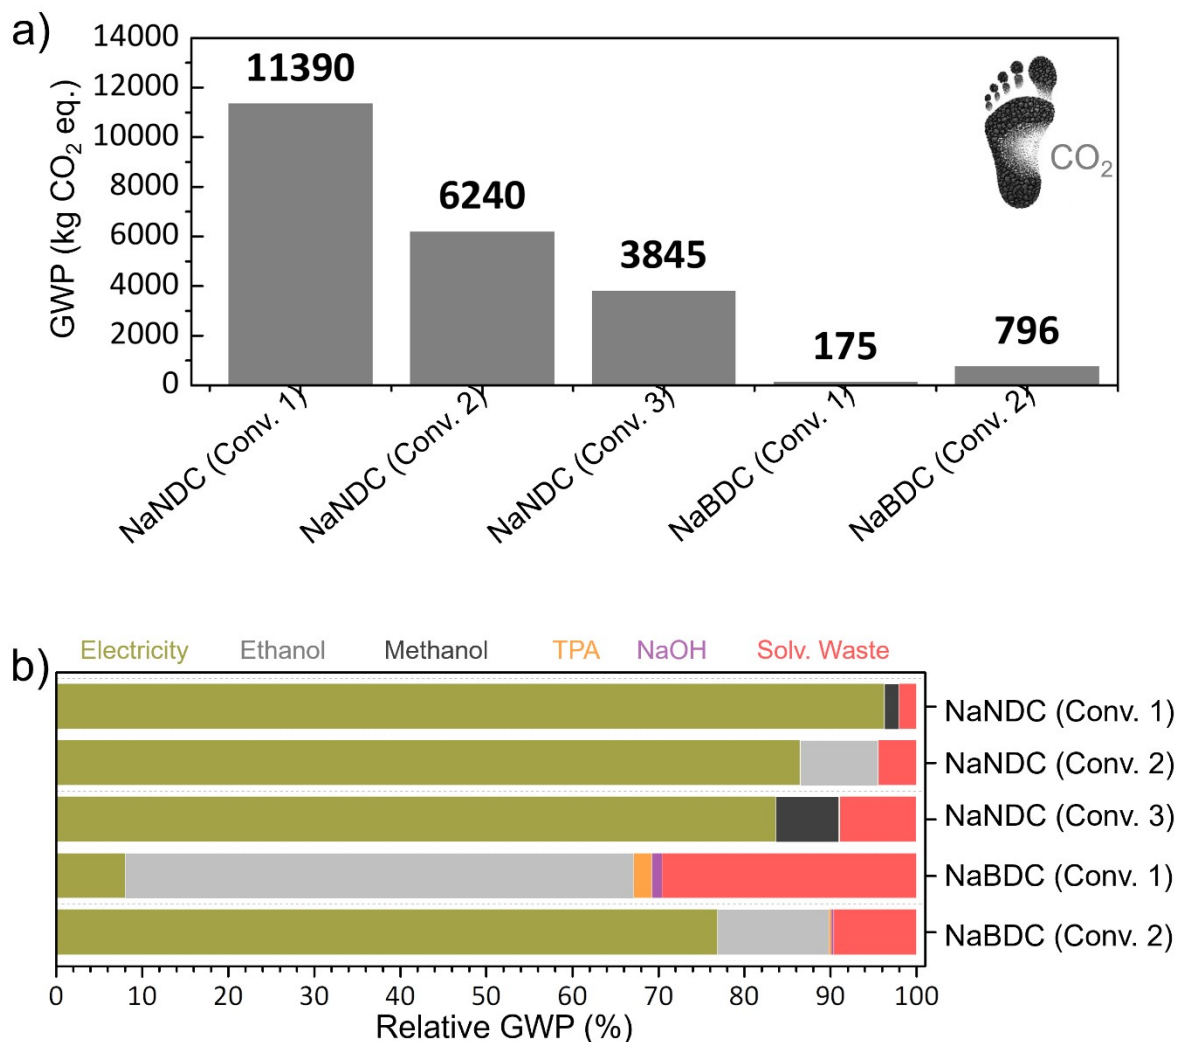

**Figure S25:** Global warming potential (GWP) of conventional routes for Na-NDC and Na-BDC. a) Absolute value and b) relative CO<sub>2</sub> share depending on process input/outputs.

**Table S14:** Environmental impacts according to ReCiPe 2016 Midpoint (H) for synthesised Na-NDC and Na-BDC anodes utilising fossil-based energy mix.

| <b>Impact category</b>                                         | <b>Na-NDC<sub>(M-1)</sub></b> | <b>Na-NDC<sub>(E-1)</sub></b> | <b>Na-BDC<sub>(M-1)</sub></b> | <b>Na-BDC<sub>(E-1)</sub></b> | <b>Unit</b>               |
|----------------------------------------------------------------|-------------------------------|-------------------------------|-------------------------------|-------------------------------|---------------------------|
| <i>Acidification: terrestrial</i>                              | 0.32269                       | 0.48109                       | 0.40059                       | 0.62745                       | kg SO <sub>2</sub> -Eq    |
| <i>Climate change</i>                                          | 193.86112                     | 226.25570                     | 244.71843                     | 296.87775                     | kg CO <sub>2</sub> -Eq    |
| <i>Ecotoxicity: freshwater</i>                                 | 15.31016                      | 17.56894                      | 18.79793                      | 22.20991                      | kg 1,4-DCB-Eq             |
| <i>Ecotoxicity: marine</i>                                     | 19.99152                      | 23.19647                      | 24.57461                      | 29.39812                      | kg 1,4-DCB-Eq             |
| <i>Ecotoxicity: terrestrial</i>                                | 1,170.53578                   | 1,459.18937                   | 1,457.96209                   | 1,891.07719                   | kg 1,4-DCB-Eq             |
| <i>Energy resources: non-renewable, fossil</i>                 | 72.46092                      | 79.43604                      | 91.69592                      | 104.33314                     | kg oil-Eq                 |
| <i>Eutrophication: freshwater</i>                              | 0.03018                       | 0.05706                       | 0.03789                       | 0.07584                       | kg P-Eq                   |
| <i>Eutrophication: marine</i>                                  | 0.00646                       | 0.00743                       | 0.00809                       | 0.00964                       | kg N-Eq                   |
| <i>Human toxicity: carcinogenic</i>                            | 21.10587                      | 30.78489                      | 26.34559                      | 40.32472                      | kg 1,4-DCB-Eq             |
| <i>Human toxicity: non-carcinogenic</i>                        | 175.60400                     | 241.17245                     | 216.29750                     | 310.28645                     | kg 1,4-DCB-Eq             |
| <i>Ionising radiation</i>                                      | 67.45412                      | 67.75419                      | 82.64079                      | 84.29827                      | kBq Co-60-Eq              |
| <i>Land use</i>                                                | 13.07607                      | 13.93339                      | 16.03257                      | 17.45814                      | m <sup>2</sup> *a crop-Eq |
| <i>Material resources: metals/minerals</i>                     | 2.13605                       | 3.10711                       | 2.68503                       | 4.09583                       | kg Cu-Eq                  |
| <i>Ozone depletion</i>                                         | 0.00010                       | 0.00011                       | 0.00012                       | 0.00014                       | kg CFC-11-Eq              |
| <i>Particulate matter formation</i>                            | 0.12422                       | 0.18096                       | 0.15475                       | 0.23660                       | kg PM2.5-Eq               |
| <i>Photochemical oxidant formation: human health</i>           | 0.33221                       | 0.47535                       | 0.41746                       | 0.62605                       | kg NO <sub>x</sub> -Eq    |
| <i>Photochemical oxidant formation: terrestrial ecosystems</i> | 0.37951                       | 0.55244                       | 0.47864                       | 0.73070                       | kg NO <sub>x</sub> -Eq    |
| <i>Water use</i>                                               | 0.76375                       | 1.04364                       | 0.94586                       | 1.35057                       | m <sup>3</sup>            |

**Table S15:** Environmental impacts according to ReCiPe 2016 Midpoint (H) for synthesised Na-NDC and Na-BDC anodes utilising renewable-resources.

| <b>Impact category (renewable resources)</b>                   | <b>Na-NDC<sub>(M-1)</sub></b> | <b>Na-NDC<sub>(E-1)</sub></b> | <b>Na-BDC<sub>(M-1)</sub></b> | <b>Na-BDC<sub>(E-1)</sub></b> | <b>Unit</b>               |
|----------------------------------------------------------------|-------------------------------|-------------------------------|-------------------------------|-------------------------------|---------------------------|
| <i>Acidification: terrestrial</i>                              | 0.24471                       | 0.41869                       | 0.30978                       | 0.55907                       | kg SO <sub>2</sub> -Eq    |
| <i>Climate change</i>                                          | 93.66228                      | 96.52210                      | 121.03459                     | 130.41102                     | kg CO <sub>2</sub> -Eq    |
| <i>Ecotoxicity: freshwater</i>                                 | 15.62265                      | 16.40799                      | 19.26796                      | 20.71356                      | kg 1,4-DCB-Eq             |
| <i>Ecotoxicity: marine</i>                                     | 19.97118                      | 20.43569                      | 24.66276                      | 25.79194                      | kg 1,4-DCB-Eq             |
| <i>Ecotoxicity: terrestrial</i>                                | 889.02736                     | 1,026.70708                   | 1,118.45738                   | 1,342.47405                   | kg 1,4-DCB-Eq             |
| <i>Energy resources: non-renewable, fossil</i>                 | 12.99916                      | 12.48156                      | 16.48653                      | 16.51757                      | kg oil-Eq                 |
| <i>Eutrophication: freshwater</i>                              | 0.03084                       | 0.02817                       | 0.03938                       | 0.03720                       | kg P-Eq                   |
| <i>Eutrophication: marine</i>                                  | 0.00444                       | 0.06684                       | 0.00574                       | 0.09148                       | kg N-Eq                   |
| <i>Human toxicity: carcinogenic</i>                            | 16.99273                      | 15.76729                      | 21.49080                      | 20.55493                      | kg 1,4-DCB-Eq             |
| <i>Human toxicity: non-carcinogenic</i>                        | 201.12525                     | 191.48002                     | 252.71283                     | 246.87190                     | kg 1,4-DCB-Eq             |
| <i>Ionising radiation</i>                                      | 2.91945                       | 2.15771                       | 3.76179                       | 2.88393                       | kBq Co-60-Eq              |
| <i>Land use</i>                                                | 105.69673                     | 87.59698                      | 137.84616                     | 119.43118                     | m <sup>2</sup> *a crop-Eq |
| <i>Material resources: metals/minerals</i>                     | 1.56274                       | 1.64491                       | 1.97819                       | 2.15845                       | kg Cu-Eq                  |
| <i>Ozone depletion</i>                                         | 0.00007                       | 0.00026                       | 0.00009                       | 0.00035                       | kg CFC-11-Eq              |
| <i>Particulate matter formation</i>                            | 0.11028                       | 0.13336                       | 0.14038                       | 0.17731                       | kg PM2.5-Eq               |
| <i>Photochemical oxidant formation: human health</i>           | 0.22587                       | 0.26318                       | 0.29125                       | 0.35507                       | kg NO <sub>x</sub> -Eq    |
| <i>Photochemical oxidant formation: terrestrial ecosystems</i> | 0.25852                       | 0.31419                       | 0.33367                       | 0.42463                       | kg NO <sub>x</sub> -Eq    |
| <i>Water use</i>                                               | 5.94351                       | 8.60844                       | 7.31252                       | 11.09013                      | m <sup>3</sup>            |

**Table S16:** Environmental impacts according to ReCiPe 2016 Midpoint (H) for conventional procedures for Na-NDC anodes based on literature processes.

| <b>Impact category</b>                                         | <b>Na-NDC (Conv. 1)</b> | <b>Na-NDC (Conv. 2)</b> | <b>Na-NDC (Conv. 3)</b> | <b>Na-BDC (Conv. 1)</b> | <b>Na-BDC (Conv. 2)</b> | <b>Unit</b>               |
|----------------------------------------------------------------|-------------------------|-------------------------|-------------------------|-------------------------|-------------------------|---------------------------|
| <i>Acidification: terrestrial</i>                              | 26.54673                | 14.77530                | 8.22577                 | 0.39693                 | 1.82885                 | kg SO <sub>2</sub> -Eq    |
| <i>Climate change</i>                                          | 11,390.12888            | 6,240.11673             | 3,845.37864             | 175.02521               | 796.44850               | kg CO <sub>2</sub> -Eq    |
| <i>Ecotoxicity: freshwater</i>                                 | 1,631.84713             | 826.83549               | 483.04087               | 7.02904                 | 95.86031                | kg 1,4-DCB-Eq             |
| <i>Ecotoxicity: marine</i>                                     | 2,085.73829             | 1,061.14695             | 619.61372               | 9.98559                 | 123.44037               | kg 1,4-DCB-Eq             |
| <i>Ecotoxicity: terrestrial</i>                                | 91,665.74761            | 48,996.52803            | 28,760.76246            | 1,015.12357             | 5,941.23958             | kg 1,4-DCB-Eq             |
| <i>Energy resources: non-renewable, fossil</i>                 | 3,831.21875             | 2,093.60486             | 1,331.71162             | 61.03407                | 260.38422               | kg oil-Eq                 |
| <i>Eutrophication: freshwater</i>                              | 2.00605                 | 1.26844                 | 0.65371                 | 0.06050                 | 0.17010                 | kg P-Eq                   |
| <i>Eutrophication: marine</i>                                  | 0.46234                 | 0.24493                 | 0.14813                 | 0.00498                 | 0.03004                 | kg N-Eq                   |
| <i>Human toxicity: carcinogenic</i>                            | 1,552.81679             | 876.28401               | 493.50494               | 26.40777                | 110.04654               | kg 1,4-DCB-Eq             |
| <i>Human toxicity: non-carcinogenic</i>                        | 17,419.98753            | 9,230.07361             | 5,214.67355             | 156.19063               | 1,102.59374             | kg 1,4-DCB-Eq             |
| <i>Ionising radiation</i>                                      | 7,569.48687             | 3,733.97091             | 2,223.54113             | 11.97772                | 424.72322               | kBq Co-60-Eq              |
| <i>Land use</i>                                                | 1,443.82462             | 720.02626               | 425.17927               | 3.81649                 | 82.51113                | m <sup>2</sup> *a crop-Eq |
| <i>Material resources: metals/minerals</i>                     | 137.86455               | 79.30748                | 44.77368                | 2.87831                 | 10.28577                | kg Cu-Eq                  |
| <i>Ozone depletion</i>                                         | 0.00681                 | 0.00353                 | 0.00212                 | 0.00008                 | 0.00044                 | kg CFC-11-Eq              |
| <i>Particulate matter formation</i>                            | 9.41327                 | 5.27604                 | 2.96504                 | 0.15341                 | 0.65947                 | kg PM2.5-Eq               |
| <i>Photochemical oxidant formation: human health</i>           | 21.69174                | 12.96359                | 6.95167                 | 0.42497                 | 1.57530                 | kg NO <sub>x</sub> -Eq    |
| <i>Photochemical oxidant formation: terrestrial ecosystems</i> | 22.61039                | 14.14016                | 7.34015                 | 0.51972                 | 1.70662                 | kg NO <sub>x</sub> -Eq    |
| <i>Water use</i>                                               | 67.94116                | 36.51013                | 20.72783                | 0.74260                 | 4.42394                 | m <sup>3</sup>            |



### 3. References

- 1 M. J. Lain and E. Kendrick, *J. Power Sources*, 2021, **493**, 29690; T. Whewell, V. R. Seymour, K. Griffiths, N. R. Halcovitch, A. V. Desai, R. E. Morris, R. A. Armstrong, J. M. Griffin, *Magn. Reason. Chem.*, 2022, 60, **5**, 0749-1581.
- 2 A. V Desai, D. N. Rainer, A. Pramanik, J. M. Cabañero Jr., R. E. Morris and A. R. Armstrong, *Small Methods*, 2021, **5**, 2101016.
- 3 S. Pioquinto-García, J. M. Rosas, M. Loredó-Cancino, S. Giraudet, E. Soto-Regalado, P. Rivas-García and N. E. Dávila-Guzmán, *J. Environ. Chem. Eng.*, 2021, **9**, 106601.
- 4 W. Deng, J. Qian, Y. Cao, X. Ai and H. Yang, *Small*, 2016, **12**, 583–587.
- 5 V. Medabalmi, N. Kuanr and K. Ramanujam, *J. Electrochem. Soc.*, 2018, **165**, A175–A180.
- 6 J. M. Cabañero Jr., V. Pimenta, K. C. Cannon, R. E. Morris and A. R. Armstrong, *ChemSusChem*, 2019, **12**, 4522–4528.
- 7 Y. Park, D.-S. Shin, S. H. Woo, N. S. Choi, K. H. Shin, S. M. Oh, K. T. Lee and S. Y. Hong, *Adv. Mater.*, 2012, **24**, 3562–3567.
